# Supplementary material for: Postreproductive killer whale grandmothers improve the survival of their grandoffspring
Source: PubMed Central journal article supplement (PMC6936675; doi:10.1073/pnas.1903844116), 2019-12-09
Supplement: pnas.1903844116.sapp.pdf [file pnas.1903844116.sapp.pdf]

# 1 Supplementary Information for

## 2 **Post-reproductive Killer Whale Grandmothers Improve the Survival of their Grandoffspring**

3 Stuart Nattrass, Darren Croft P., Samuel Ellis, Michael A. Cant, Michael N. Weiss, Brianna Wright, Eva  
4 Stredulinsky, Thomas Doniol-Valcroze, John K.B. Ford, Kenneth C. Balcomb, Daniel W. Franks

5 Corresponding author: Daniel Franks

6 Email: [daniel.franks@york.ac.uk](mailto:daniel.franks@york.ac.uk)

7

### 8 **This PDF file includes:**

9           Supplementary text

10           Tables S1 to S12

11           Data Description

### 12 **Supplementary information**

13 Parameter list for coefficients used in the model comparisons:

14 *sex* = 1 if individual is male, 0 if female, and 0.5 if unknown

15 *MR* = 1 if mother died in last 2 years

16 *ML* = 1 if mother died prior to last 2 years

17 *sMA* = *sex* if mother is living

18 *sMR* = *sex* if *MR*=1

19 *sML* = *sex* if *ML*=1

20 *gmA* = 1 if grandmother is living

21 *gmR* = 1 if grandmother died in last 2 years

22 *gmL* = 1 if grandmother died prior to last 2 years

23 *sgmA* = *sex* if *gmA* = 1

24 *sgmR* = *sex* if *gmR* = 1

25 *sgmL* = *sex* if *gmL*= 1

26 *gmo45* =1 if the grandmother has died and was aged over 45 (post-reproductive) at death

27 *slm* = observed salmon abundance in given year

28 *mageAlive* = current age of the focal individuals mother if she is alive, 0 otherwise

29 Each binary parameter is set to zero if their respective conditions are not met.

30

### 31 **Model Selection**

32 Each table 3-6 presents the median hazard coefficients of the variables over 10,000 randomisations  
 33 of the death order. The final column represents our model selection criteria, where the lowest AIC is  
 34 considered the most parsimonious model. The best model is highlighted in bold. Mother effect  
 35 models were used to determine which mothering terms were included in the models, with the terms  
 36 from the best mother model being carried over.

37 All statistical models were compared via AIC. We calculate  $\Delta AIC$  for each of  $R$  models by subtracting  
 38 the minimum AIC value from all AICs, and then calculate model weights ( $w$ ) for each model  $i$  as

$$39 \quad w_i = \frac{\exp(-0.5 \cdot \Delta AIC_i)}{\sum_{r=1}^R \exp(-0.5 \cdot \Delta AIC_r)}$$

40 This quantity is often interpreted as the probability that a given model is the K-L best model out of  
 41 the candidate set (table 1).

42 **Table S1.** Summary of models and selection criteria. All models with  $\Delta AIC < 2$  are in bold

| Model     | Terms                                              | AIC             | $\Delta AIC$    | w               |
|-----------|----------------------------------------------------|-----------------|-----------------|-----------------|
| 1         | MR + ML + sMA + sMR + sML                          | 1263.629        | 9.569495        | 0.001598        |
| 2         | sMA + sMR + sML                                    | 1260.415        | 6.355493        | 0.007972        |
| 3         | sMR                                                | 1258.323        | 4.263298        | 0.022692        |
| 4         | gmA                                                | 1272.207        | 18.1471         | 2.19E-05        |
| 5         | MR + ML + sMA + sMR + sML + mageA                  | 1265.129        | 11.06929        | 0.000755        |
| 6         | sMA + sMR + sML + mageA                            | 1262.144        | 8.084595        | 0.003358        |
| 7         | sMR + mageA                                        | 1260.102        | 6.04215         | 0.009324        |
| 8         | sMR + gmR + gmL + sgmA + sgmR + sgmL + slm         | 1259.384        | 5.324206        | 0.013351        |
| 9         | sMR + gmR + gmL + sgmA + sgmR + sgmL + gmo45 + slm | 1260.588        | 6.528728        | 0.00731         |
| <b>10</b> | <b>sMR + gmR + gmo45</b>                           | <b>1254.824</b> | <b>0.764295</b> | <b>0.13052</b>  |
| <b>11</b> | <b>sMR + gmR + gmo45 + slm</b>                     | <b>1255.435</b> | <b>1.375307</b> | <b>0.096161</b> |
| 12        | sMR + gmR + slm                                    | 1256.759        | 2.699272        | 0.049602        |
| <b>13</b> | <b>sMR + gmR</b>                                   | <b>1255.882</b> | <b>1.821992</b> | <b>0.076913</b> |
| 14        | sMR + gmR + gmo45 + slm + gmR:slm + gmo45:slm      | 1257.172        | 3.112457        | 0.040344        |
| <b>15</b> | <b>sMR + gmR + gmo45 + slm + gmR:slm</b>           | <b>1255.353</b> | <b>1.293509</b> | <b>0.100175</b> |
| <b>16</b> | <b>sMR + gmR + gmo45 + gmR:slm</b>                 | <b>1254.06</b>  | <b>0</b>        | <b>0.191267</b> |
| 17        | sMR + gmR + gmo45 + slm + gmo45:slm                | 1257.148        | 3.088062        | 0.040839        |
| <b>18</b> | <b>sMR + gmR + gmo45 + gmo45:slm</b>               | <b>1255.42</b>  | <b>1.360516</b> | <b>0.096874</b> |
| <b>19</b> | <b>sMR + gmR + gmo45 + gmR:slm + mageA</b>         | <b>1256.055</b> | <b>1.995649</b> | <b>0.070517</b> |

|    |                             |          |          |          |
|----|-----------------------------|----------|----------|----------|
| 20 | sMR + gmR + gmR:slm + mageA | 1257.169 | 3.109427 | 0.040405 |
|----|-----------------------------|----------|----------|----------|

43

44 A term's model-averaged coefficient  $\bar{\beta}$  is then

45 
$$\bar{\beta} = \sum_{i=1}^R w_i \hat{\beta}_i$$

46 Where  $\hat{\beta}$  is the estimated coefficient of the term in model  $i$ , which is 0 when the term is not included  
 47 in the model.

48 Similarly, a term's variable importance is simply the sum of the weights of the models in which that  
 49 term is included (table 2).

50 **Table S2.** Model averaged coefficients and variable importance for all terms. Terms with variable  
 51 importance > 0.9 are in bold.

| Term                   | Model Averaged Coefficient | Variable Importance |
|------------------------|----------------------------|---------------------|
| motherrecent           | 0.001574                   | 0.002353            |
| motherlong             | 0.000934                   | 0.002353            |
| sexmotheralive         | 0.004516                   | 0.013683            |
| <b>sexmotherrecent</b> | <b>2.884683</b>            | <b>0.999978</b>     |
| sexmotherlong          | 0.003597                   | 0.013683            |
| motheragealive         | 8.53E-05                   | 0.124359            |
| gmalive                | -8.66E-06                  | 2.19E-05            |
| <b>gmrecent</b>        | <b>2.128937</b>            | <b>0.954278</b>     |
| gmlong                 | 0.000734                   | 0.020661            |
| sexgmalive             | 0.001895                   | 0.020661            |
| sexgmrecent            | 0.008289                   | 0.020661            |
| sexgmlong              | 0.010244                   | 0.020661            |
| gmover45               | 0.37338                    | 0.774007            |
| salmon                 | -0.06953                   | 0.347782            |
| gmRslm                 | -1.11666                   | 0.442708            |
| gmo45slm               | -0.05812                   | 0.178058            |

52

53

54

55 **Mother effect model selection**

| Model | MR                                     | ML                                     | sMA                                    | sMR                                    | sML                                    | AIC      |
|-------|----------------------------------------|----------------------------------------|----------------------------------------|----------------------------------------|----------------------------------------|----------|
| 1     | 0.587<br>(-1.659:<br>2.903)<br>P=0.594 | 0.276<br>(-0.789:<br>1.341)<br>P=0.612 | 0.363<br>(-0.135:<br>0.861)<br>P=0.153 | 2.503<br>(-0.327:<br>5.174)<br>P=0.081 | 0.056<br>(-1.294:<br>1.409)<br>P=0.935 | 1263.629 |
| 2     |                                        |                                        | 0.327<br>(-0.149:<br>0.805)<br>P=0.179 | 3.079<br>(2.017:<br>4.155)<br>P=1.0e-8 | 0.285<br>(-0.735:<br>1.305)<br>P=0.584 | 1260.415 |
| 3     |                                        |                                        |                                        | 2.893<br>(1.831:<br>3.927)<br>P=8.4e-8 |                                        | 1258.323 |

56 **Table S3:** Statistics for fitted models with only the mother survival terms, and sex terms.

57 **Grandmother alive/dead only model**

| Model | gmA                                      | AIC      |
|-------|------------------------------------------|----------|
| 4     | -0.395<br>(-0.775:<br>-0.015)<br>P=0.042 | 1272.207 |

58 **Table S4:** Statistics for the fitted model with only the grandmother alive/dead survival term.

59 **Mother effect model selection including mageAlive**

| Model | MR                                     | ML                                     | sMA                                    | sMR                                    | sML                                    | mageAlive                              | AIC      |
|-------|----------------------------------------|----------------------------------------|----------------------------------------|----------------------------------------|----------------------------------------|----------------------------------------|----------|
| 5     | 0.841<br>(-1.507:<br>3.214)<br>P=0.493 | 0.653<br>(-0.737:<br>2.046)<br>P=0.358 | 0.347<br>(-0.149:<br>0.846)<br>P=0.170 | 2.587<br>(-0.296:<br>5.313)<br>P=0.077 | 0.045<br>(-1.316:<br>1.407)<br>P=0.948 | 0.009<br>(-0.013:<br>0.032)<br>P=0.413 | 1265.129 |
| 6     |                                        |                                        | 0.316<br>(-0.171:<br>0.804)<br>P=0.204 | 3.150<br>(1.955:<br>4.357)<br>P=2.6e-7 | 0.358<br>(-0.830:<br>1.546)<br>P=0.555 | 0.002<br>(-0.154:<br>0.020)<br>P=0.801 | 1262.144 |

|   |  |  |  |                                        |  |                                        |          |
|---|--|--|--|----------------------------------------|--|----------------------------------------|----------|
| 7 |  |  |  | 2.968<br>(1.839:<br>4.100)<br>P=1.8e-7 |  | 0.002<br>(-0.012:<br>0.017)<br>P=0.763 | 1260.102 |
|---|--|--|--|----------------------------------------|--|----------------------------------------|----------|

60 **Table S5:** Statistics for fitted models with only the mother survival terms, and sex terms, but with current mother age  
61 added to each model from table S3.

62

63 **Grandmother model selection**

| Model | <i>sMR</i>                             | <i>gmR</i>                             | <i>gmL</i>                              | <i>sgmA</i>                            | <i>sgmR</i>                            | <i>sgmL</i>                            | <i>gmo45</i>                           | <i>slm</i>                              | <i>AIC</i> |
|-------|----------------------------------------|----------------------------------------|-----------------------------------------|----------------------------------------|----------------------------------------|----------------------------------------|----------------------------------------|-----------------------------------------|------------|
| 8     | 2.622<br>(1.561:<br>3.683)<br>P=9.7e-7 | 0.813<br>(-0.625:<br>2.254)<br>P=0.268 | 0.082<br>(-0.589:<br>0.752)<br>P=0.811  | 0.091<br>(-0.646:<br>0.826)<br>P=0.809 | 0.408<br>(-1.413:<br>2.262)<br>P=0.654 | 0.503<br>(-0.118:<br>1.126)<br>P=0.113 |                                        | -0.233<br>(-0.665:<br>0.200)<br>P=0.292 | 1259.384   |
| 9     | 2.668<br>(1.597:<br>3.748)<br>P=9.7e-7 | 0.652<br>(-0.852:<br>2.149)<br>P=0.395 | -0.049<br>(-0.790:<br>0.690)<br>P=0.892 | 0.094<br>(-0.644:<br>0.830)<br>P=0.804 | 0.389<br>(-1.448:<br>2.261)<br>P=0.673 | 0.482<br>(-0.139:<br>1.104)<br>P=0.128 | 0.253<br>(-0.288:<br>0.795)<br>P=0.359 | -0.232<br>(-0.665:<br>0.201)<br>P=0.294 | 1260.588   |
| 10    | 2.926<br>(1.876:<br>3.974)<br>P=4.5e-8 | 0.718<br>(-0.135:<br>1.570)<br>P=0.099 |                                         |                                        |                                        |                                        | 0.386<br>(-0.019:<br>0.792)<br>P=0.062 |                                         | 1254.824   |
| 11    | 2.863<br>(1.810:<br>3.915)<br>P=1.0e-7 | 0.688<br>(-0.169:<br>1.544)<br>P=0.116 |                                         |                                        |                                        |                                        | 0.384<br>(-0.022:<br>0.790)<br>P=0.063 | -0.237<br>(-0.672:<br>0.199)<br>P=0.287 | 1255.435   |
| 12    | 2.823                                  | 0.887                                  |                                         |                                        |                                        |                                        |                                        | -0.238                                  | 1256.759   |

|    |                                        |                                       |  |  |  |  |  |                               |              |
|----|----------------------------------------|---------------------------------------|--|--|--|--|--|-------------------------------|--------------|
|    | (1.777:<br>3.878)<br>P=1.5e-7          | (0.058:<br>1.716)<br>P=0.036          |  |  |  |  |  | (-0.673:<br>0.197)<br>P=0.283 |              |
| 13 | 2.899<br>(1.853:<br>3.940)<br>P=5.3e-8 | 0.924<br>(0.097:<br>1.750)<br>P=0.029 |  |  |  |  |  |                               | 1255.8<br>82 |

64 **Table S6:** Statistics for fitted models with mother, grandmother, sex interactions, and additive salmon terms.

65 **Interaction between grandmothing and salmon abundance**

| Model     | <i>sMR</i>                                                   | <i>gmR</i>                                                   | <i>Gmo45</i>                                                 | <i>slm</i>                              | <i>gmR*slm</i>                                                | <i>Gmo45*slm</i>                        | AIC            |
|-----------|--------------------------------------------------------------|--------------------------------------------------------------|--------------------------------------------------------------|-----------------------------------------|---------------------------------------------------------------|-----------------------------------------|----------------|
| 14        | 2.859<br>(1.802:<br>3.922)<br>P=1.3e-7                       | 1.477<br>(-1.683:<br>4.858)<br>P=0.369                       | 0.648<br>(-0.703:<br>2.001)<br>P=0.347                       | -0.129<br>(-0.671:<br>0.414)<br>P=0.643 | -0.578<br>(-3.327:<br>1.997)<br>P=0.671                       | -0.202<br>(-10108:<br>0.704)<br>P=0.662 | 1257.172       |
| 15        | 2.853<br>(1.795:<br>3.912)<br>P=1.3e-7                       | 3.853<br>(-1.129:<br>8.169)<br>P=0.107                       | 0.369<br>(-0.041:<br>0.778)<br>P=0.078                       | -0.193<br>(-0.632:<br>0.246)<br>P=0.388 | -2.496<br>(-6.258:<br>0.246)<br>P=0.194                       |                                         | 1255.353       |
| <b>16</b> | <b>2.898</b><br><b>(1.842:<br/>3.955)</b><br><b>P=7.6e-8</b> | <b>4.318</b><br><b>(-0.731:<br/>8.544)</b><br><b>P=0.086</b> | <b>0.368</b><br><b>(-0.041:<br/>0.778)</b><br><b>P=0.078</b> |                                         | <b>-2.811</b><br><b>(-6.542:<br/>1.533)</b><br><b>P=0.152</b> |                                         | <b>1254.06</b> |
| 17        | 2.868<br>(1.816:<br>3.925)<br>P=1.0e-7                       | 0.657<br>(-0.202:<br>1.518)<br>P=0.134                       | 0.767<br>(-0.570:<br>2.103)<br>P=0.261                       | -0.137<br>(-0.681:<br>0.406)<br>P=0.621 |                                                               | -0.267<br>(-1.166:<br>0.632)<br>P=0.561 | 1257.148       |
| 18        | 2.891<br>(1.843:<br>3.945)<br>P=7.3e-8                       | 0.657<br>(-0.202:<br>1.517)<br>P=0.134                       | 0.961<br>(-0.123:<br>2.046)<br>P=0.082                       |                                         |                                                               | -0.403<br>(-1.124:<br>0.318)<br>0.274   | 1255.42        |

66 **Table S7:** Statistics for fitted models that include an interaction between grandmother death and salmon index

67

68 **Comparison of mother age and post-reproductive grandmother effects in best fitting model**

| Model | sMR                                    | gmR                                    | Gmo45                                  | gmR:slm                                 | mageAlive                                | AIC      |
|-------|----------------------------------------|----------------------------------------|----------------------------------------|-----------------------------------------|------------------------------------------|----------|
| 19    | 2.894<br>(1.750:<br>4.037)<br>P=7.8e-7 | 4.167<br>(-0.786:<br>8.432)<br>P=0.086 | 0.372<br>(-0.046:<br>0.789)<br>P=0.081 | -2.704<br>(-6.441:<br>1.526)<br>P=0.156 | -0.0004<br>(-0.015:<br>0.014)<br>P=0.917 | 1256.055 |
| 20    | 2.940<br>(1.793:<br>4.086)<br>P=5.4e-7 | 4.519<br>(-0.375:<br>8.808)<br>P=0.065 |                                        | -2.847<br>(-6.618:<br>1.391)<br>P=0.139 | 0.002<br>(-0.013:<br>0.017)<br>P=0.789   | 1257.169 |

69 **Table S8:** Statistics for models comparing the best fitting model from Table S7 to that same model including current  
70 mother age, and replacing grandmother age at death with current mother age

71

72 **Baseline hazard results for model 16**

| Age  | survival  |
|------|-----------|
| 0    | 1         |
| 0.01 | 0.9317914 |
| 1    | 0.9109458 |
| 2    | 0.8922604 |
| 3    | 0.8662591 |
| 4    | 0.8325562 |
| 5    | 0.8086164 |
| 6    | 0.7917492 |
| 7    | 0.7774825 |
| 8    | 0.7666257 |
| 9    | 0.7630136 |
| 10   | 0.7554141 |
| 11   | 0.7515013 |
| 12   | 0.7428485 |
| 13   | 0.7245344 |
| 14   | 0.7102096 |
| 15   | 0.7001025 |
| 16   | 0.6948398 |
| 17   | 0.6948398 |
| 18   | 0.6842934 |
| 19   | 0.6842934 |
| 20   | 0.6842934 |
| 21   | 0.6432206 |
| 22   | 0.6233646 |
| 23   | 0.6233646 |
| 24   | 0.6067848 |

|    |           |
|----|-----------|
| 25 | 0.5789901 |
| 26 | 0.5674077 |
| 27 | 0.5674077 |
| 28 | 0.5674077 |
| 29 | 0.5674077 |
| 30 | 0.5674077 |
| 31 | 0.5674077 |
| 32 | 0.5171197 |
| 33 | 0.5171197 |
| 34 | 0.5171197 |
| 35 | 0.5171197 |
| 36 | 0.5171197 |
| 37 | 0.5171197 |
| 38 | 0.3716110 |
| 39 | 0.3202017 |
| 40 | 0.3202017 |
| 41 | 0.3202017 |

73 **Table S9:** The baseline hazard for the best fitting model 16. This baseline is the case where both mother and grandmother  
74 remain alive for the duration

75

76 **Data Information**

77 Each row of data accounts for a period of an individual whale’s life. This time period is generally a  
78 single year, except in cases where multiple family members die within the same year. In this case,  
79 the period of time covered by a row is assigned a duration of 0.01 years.

80 The data as presented contains the assumption that the focal individual dies last whenever there are  
81 multiple family members who die within the same year. The column p.rowexists is then used to  
82 facilitate randomisation of death order (see below)

83 **Variable Details**

- 84 • Id
  - 85 ○ Anonymised identifier for the individual whale
- 86 • X.mother
  - 87 ○ Anonymised identifier for the mother of the focal individual. Hereafter referred to as  
88 “the mother”
- 89 • Grandmother
  - 90 ○ Anonymised identifier for the focal individual’s grandmother. Hereafter referred to  
91 as “the grandmother”
- 92 • Sex
  - 93 ○ 1 if male, 0 if female. Individuals of unknown sex are assigned a value of 0.5,  
94 equivalent to randomised sex



- 95 • Salmon
  - 96 ○ Salmon index value for the time period considered
- 97 • Motheralive
  - 98 ○ 1 if the mother is still alive during this time period, 0 otherwise
- 99 • Motherrecent
  - 100 ○ 1 if the mother has died within the previous 2 years, 0 otherwise
- 101 • Motherlong
  - 102 ○ 1 if the mother has died prior to the previous two years, 0 otherwise
- 103 • Gmalive
  - 104 ○ 1 if the grandmother is alive during this time period, 0 otherwise
- 105 • Gmrecent
  - 106 ○ 1 if the grandmother has died within the previous 2 years, 0 otherwise
- 107 • Gmlong
  - 108 ○ 1 if the grandmother has died prior to the previous two years, 0 otherwise
- 109 • Sexmotheralive
  - 110 ○ The values of columns "sex" and "motheralive" multiplied
- 111 • Sexmotherrecent
  - 112 ○ The values of columns "sex" and "motherrecent" multiplied
- 113 • Sexmotherlong
  - 114 ○ The values of columns "sex" and "motherlong" multiplied
- 115 • Sexgmalive
  - 116 ○ The values of columns "sex" and "gmalive" multiplied
- 117 • Sexgmrecent
  - 118 ○ The values of columns "sex" and "gmrecent" multiplied
- 119 • Sexgmlong
  - 120 ○ The values of columns "sex" and "gmlong" multiplied
- 121 • Gmover45
  - 122 ○ 1 if the grandmother has died and was aged 45 or over at the time of death, 0 otherwise
- 123 • gmRslm
  - 124 ○ The values of columns "gmrecent" and "salmon" multiplied
- 125 • gmo45slm
  - 126 ○ The values of columns "gmover45" and "salmon" multiplied
- 127 • Startage
  - 128 ○ Age of the focal individual at the beginning of the time period
- 129 • Stopage
  - 130 ○ Age of the focal individual at the end of the time period
- 131 • Event
  - 132 ○ 1 if the individual dies during the time period, 0 otherwise
- 133 • p.rowexists
  - 134 ○ This column is used to determine the randomisation of death orders. 0 if the row is included in the analysis regardless of randomisation. 0.5 if the row is dependent on death order. If this is the case and p.rowexists=0.5, then the row will be excluded from analysis with probability 0.5, and the event signified with be moved to the previous row. This switches the assumed death order from 1) ancestors, 2) focal individual to 1) focal individual, 2) ancestors

141

142 **Survival Model for weaned individuals**

143 We extend our main models by taking the best fitting model (AIC = 1254.06; model 16) and adding  
144 parameters that consider the grandmother effects only for weaning individuals (define as those aged  
145 2 or over). Neither of these models improve model fit, or show any indication that grandmother  
146 effects are specific to weaned or unweaned grandoffspring.

147 Weaning model 1: death ~ Sexmotherrecent + GMrecent + GMover45 + GMrecent\*salmon +  
148 GMrecent\*weaned

149 AIC = 1256.0

| Parameter       | coeff | CI            | P value  |
|-----------------|-------|---------------|----------|
| Sexmotherrecent | 2.90  | 1.84 – 3.95   | 8.1e-8 * |
| Gmrecent        | 1.98  | -1.06 – 5.25  | 0.20     |
| Gmover45        | 0.37  | -0.040 – 0.78 | 0.077    |
| gmRslm          | -1.17 | -3.87 – 1.58  | 0.39     |
| Gmrecent*weaned | 0.15  | -1.56 – 1.88  | 0.78     |

150 **Table S10:** Statistics for weaning model 1, which takes the best fitting previous model (model 16) and includes the weaning  
151 status of grand offspring.

152 Weaning model 2: death ~ Sexmotherrecent + GMrecent + GMover45 + GMrecent\*salmon +  
153 GMrecent\*weaned + GMver45\*weaned

154 AIC = 1256.1

| Parameter       | coeff | CI           | P value  |
|-----------------|-------|--------------|----------|
| Sexmotherrecent | 2.91  | 1.85 – 3.97  | 7.4e-8 * |
| Gmrecent        | 4.67  | -0.44 – 9.07 | 0.067    |
| Gmover45        | -0.11 | -0.97 – 0.76 | 0.80     |
| gmRslm          | -2.73 | -6.58 – 1.53 | 0.17     |
| Gmrecent*weaned | -0.25 | -2.04 – 1.59 | 0.77     |
| Gmover45*weaned | 0.65  | -0.33 – 1.64 | 0.19     |

155 **Table S11:** Statistics for weaning model 2, which takes the best fitting previous model (model 16) and includes the weaning  
156 status of grand offspring.

157

158

159

160

161 **Interbirth Interval Model**

162 We used a generalized additive model with a Gamma error structure and identity link function, to  
 163 examine the consequences of a grandmother's alive/dead status on her daughters' interbirth  
 164 interval by regressing a number of covariates on each birth interval length. We used AIC to select  
 165 between a number of models capturing a range of covariates:

- 166 • birth.interval
  - 167 ○ The length, in years, of the birth interval.
- 168 • daughter.age
  - 169 ○ The age of the daughter at the end of the birth interval (i.e. her age in the year when  
 170 the second calf in the interval is born).
- 171 • first.calf.alive.post.weaning
  - 172 ○ 1 if the first calf in the interval survives more than 2 years into the interval (i.e. has  
 173 been weaned), otherwise it is set to 0.
- 174 • gmother.alive.end.first.calf.weaning
  - 175 ○ 1 if the grandmother (mother of the daughter whose interval is being examined) is  
 176 alive more than two years into the interval (the time after which the first calf in the  
 177 interval will, if alive, have been weaned), otherwise is it set to 0.
- 178 • gmother.alive.and.postreproductive.end.first.calf.weaning
  - 179 ○ 1 if gmother.alive.end.first.calf.weaning = 1 and the grandmother is over 45 two  
 180 years into the interval (i.e. she is alive and postreproductive by the time the first calf  
 181 has had time to be weaned), otherwise it is set to 0.
- 182 • salmon
  - 183 ○ The mean salmon abundance during the entire interval.

184 **Proposed Models**

185 Model 1 (AIC: 975.453): birth.interval ~ s(daughter.age)

186 **Model 2 (AIC: 961.8445): birth.interval ~ s(daughter.age) + first.calf.alive.post.weaning**

187 Model 3 (AIC: 976.4604): birth.interval ~ s(daughter.age) + gmother.alive.end.first.calf.weaning

188 Model 4 (AIC: 962.9218): birth.interval ~ s(daughter.age) + first.calf.alive.post.weaning +  
 189 gmother.alive.end.first.calf.weaning

190 Model 5 (AIC: 962.27): birth.interval ~ s(daughter.age) + first.calf.alive.post.weaning +  
 191 gmother.alive.end.first.calf.weaning + gmother.alive.and.postreproductive.end.first.calf.weaning

192 Model 6 (AIC: 963.9162): birth.interval ~ s(daughter.age) + first.calf.alive.post.weaning +  
 193 gmother.alive.end.first.calf.weaning + gmother.alive.and.postreproductive.end.first.calf.weaning +  
 194 salmon

| Model    | (intercept)   | s(daughter.age)                         | first.calf.alive.post.weaning        | gmother.alive.end.first.calf.weaning | gmother.alive.and.postreproductive.end.first.calf.weaning | salmon | AIC             |
|----------|---------------|-----------------------------------------|--------------------------------------|--------------------------------------|-----------------------------------------------------------|--------|-----------------|
| 1        | 5.4820        | Edf=4.645<br>(P=1.14e-12)               |                                      |                                      |                                                           |        | 975.453         |
| <b>2</b> | <b>4.2152</b> | <b>Edf=4.793</b><br><b>(P=2.17e-09)</b> | <b>1.4208</b><br><b>(P=1.55e-05)</b> |                                      |                                                           |        | <b>961.8445</b> |
| 3        | 5.2444        | Edf=4.596<br>(P=6.25e-12)               |                                      | 0.3466<br>(P=0.301)                  |                                                           |        | 976.4604        |

|   |         |                           |                         |                        |                       |                       |          |
|---|---------|---------------------------|-------------------------|------------------------|-----------------------|-----------------------|----------|
| 4 | 4.0161  | Edf=4.766<br>(P=5.68e-09) | 1.4085<br>(P=1.85e-05)  | 0.3077<br>(P=0.341)    |                       |                       | 962.9218 |
| 5 | 3.93881 | Edf=4.791<br>(P=4.13e-06) | 1.48613<br>(P=4.13e-06) | -0.03823<br>(P=0.9166) | 0.57121<br>(P=0.0824) |                       | 962.27   |
| 6 | 3.67903 | Edf=4.823<br>(P=6.44e-10) | 1.49564<br>(P=3.83e-06) | -0.04632<br>(P=0.8991) | 0.57577<br>(P=0.0806) | 0.21004<br>(P=0.6325) | 963.9162 |

195 **Table S12:** Statistics for the proposed inter birth interval models. Model 2 is the best fitting, although models 4 and 5 are  
196 within  $\Delta AIC < 2$  of model 2.

197
